# Supplementary figures and images for: Direct identification of base-paired RNA nucleotides by correlated chemical probing
Source: PubMed Central journal article supplement — RNA. 2017 Jan;23(1):6–13. doi: 10.1261/rna.058586.116 (PMC5159650; doi:10.1261/rna.058586.116), 2017-01

Figure S1

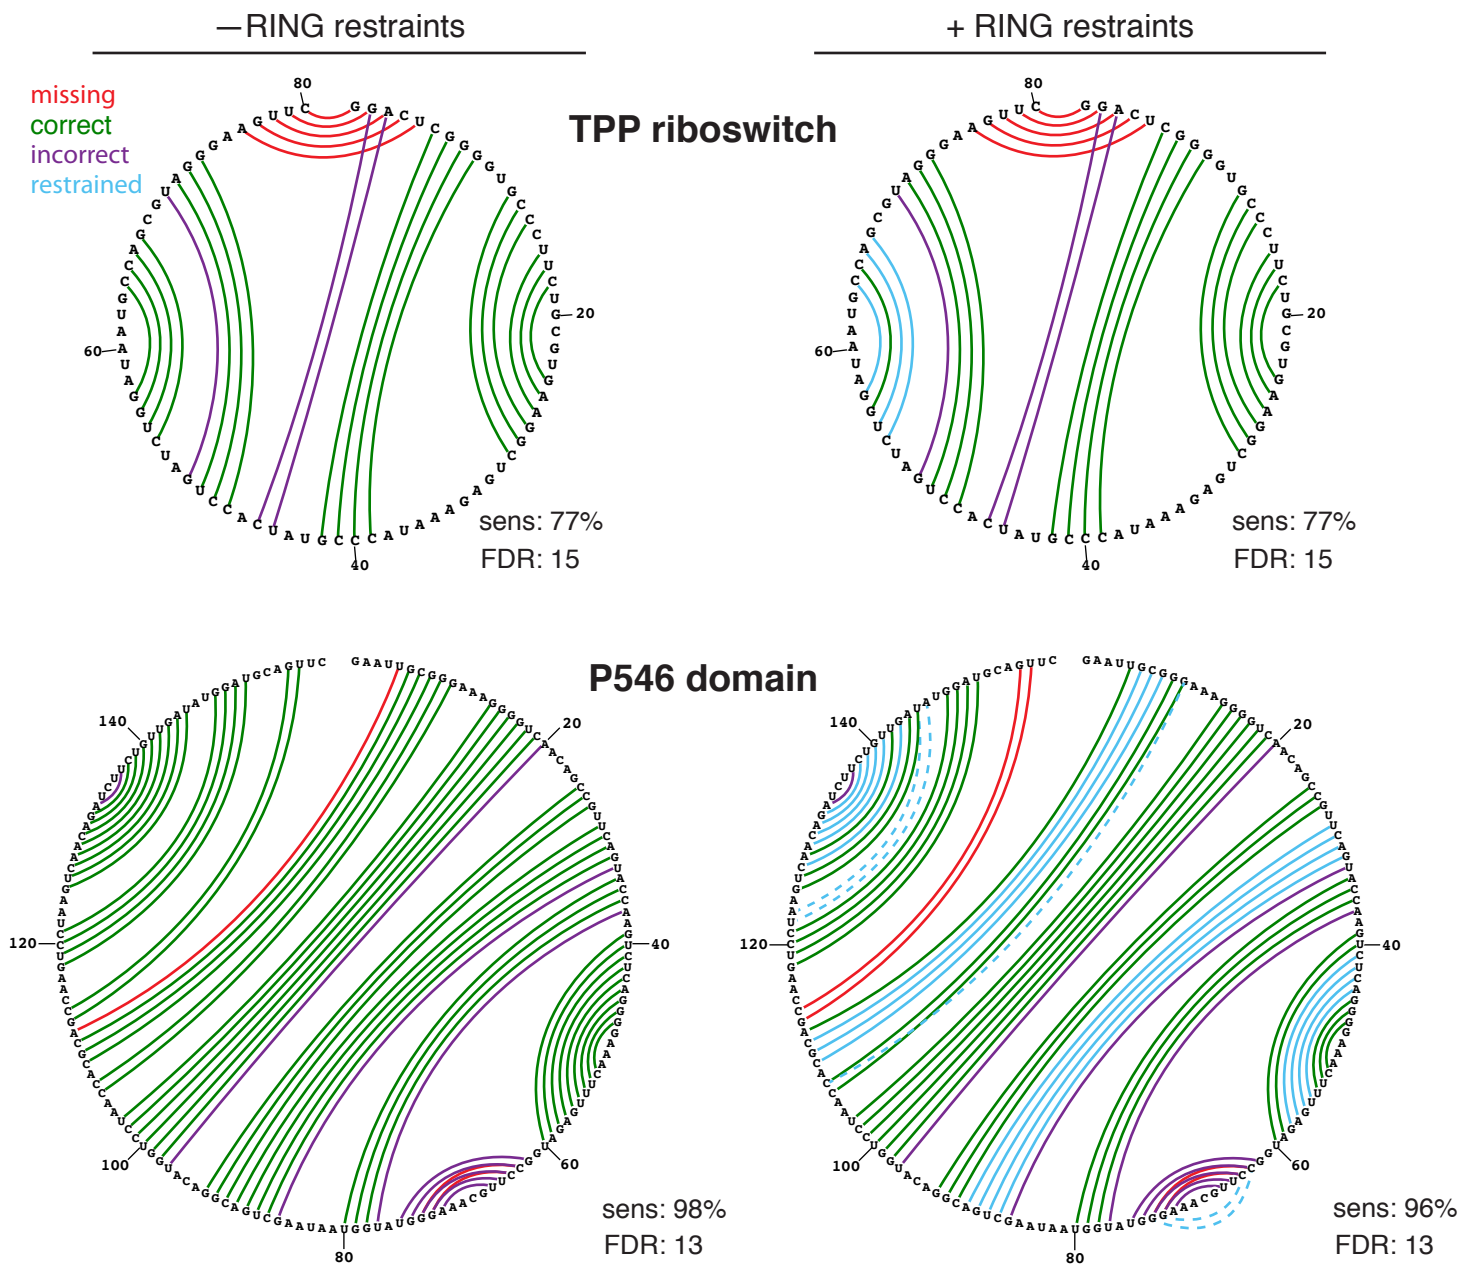

Supplement: supp_058586.116_Fig_S1_R1.pdf [file supp_058586.116_Fig_S1_R1.pdf]

Figure S2

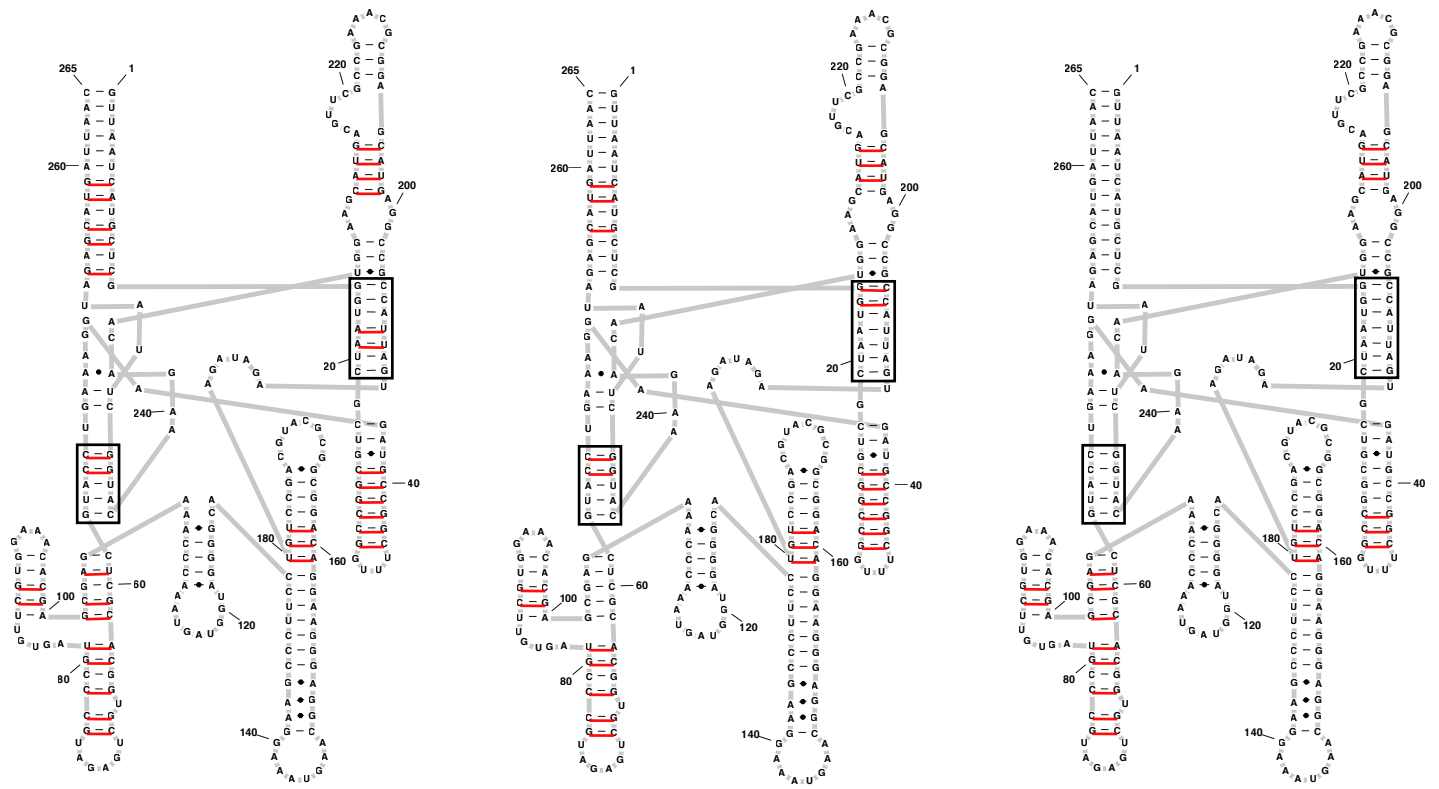

N = 810000  
sens: 32/75 = 43%  
FDR: 0/32 = 0%

N = 400000  
sens: 26/75 = 35%  
FDR: 0/26 = 0%

N = 200000  
sens: 19/75 = 25%  
FDR: 0/19 = 0%

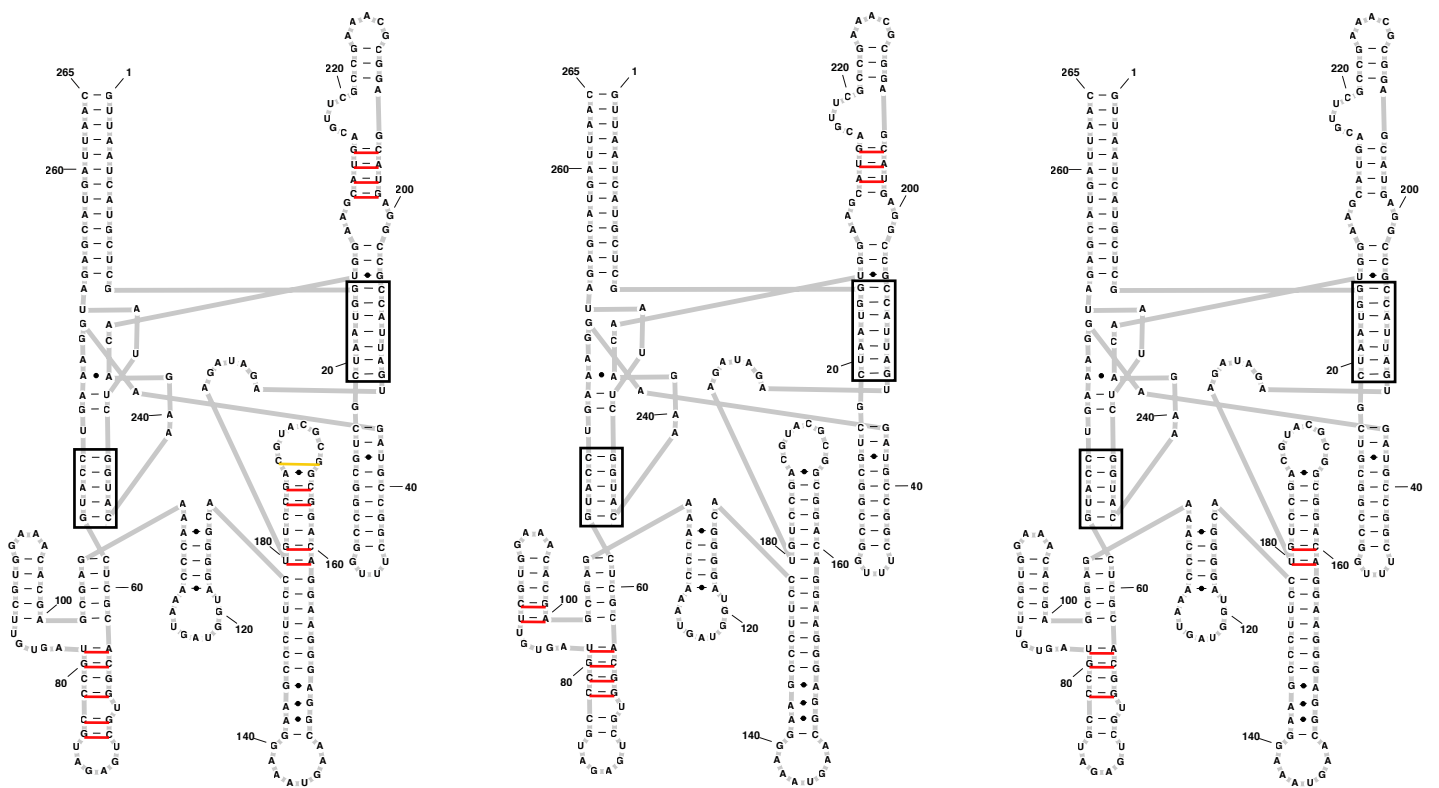

N=100000  
sens: 13/75=17%  
FDR: 1/14=7%

N = 50000  
sens: 9/75 = 12%  
FDR: 0/9 = 0%

N = 20000  
sens: 5/75 = 6.7%  
FDR: 0/5 = 0%

Supplement: supp_058586.116_Fig_S2.pdf [file supp_058586.116_Fig_S2.pdf]

**Figure S3**

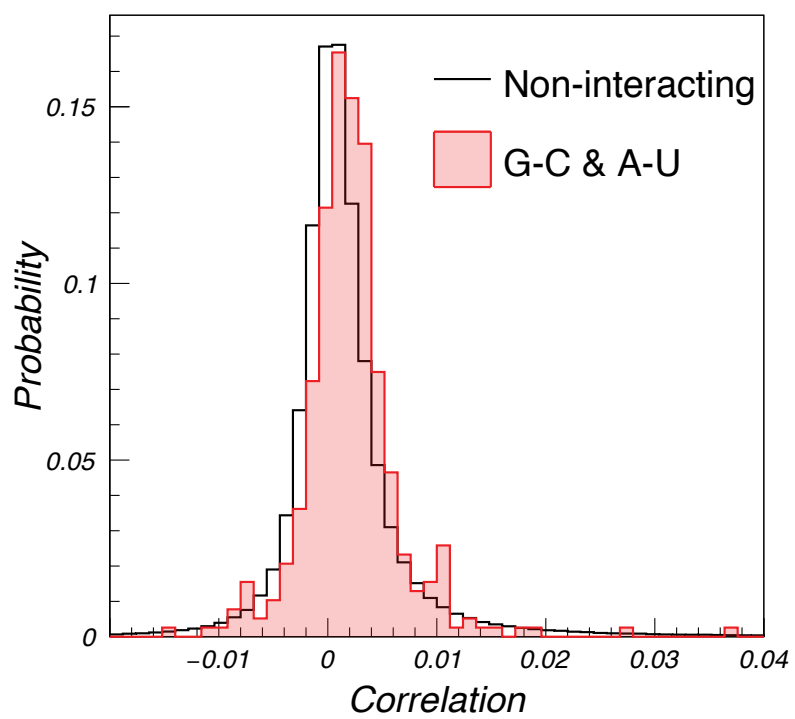

Supplement: supp_058586.116_Fig_S3_R1.pdf [file supp_058586.116_Fig_S3_R1.pdf]
